# Supplementary material
Source: PubMed Central journal article supplement (PMC6728189)
Supplement: NIHMS1533162-supplement-Figures.pdf [file NIHMS1533162-supplement-Figures.pdf]

Fig. S1

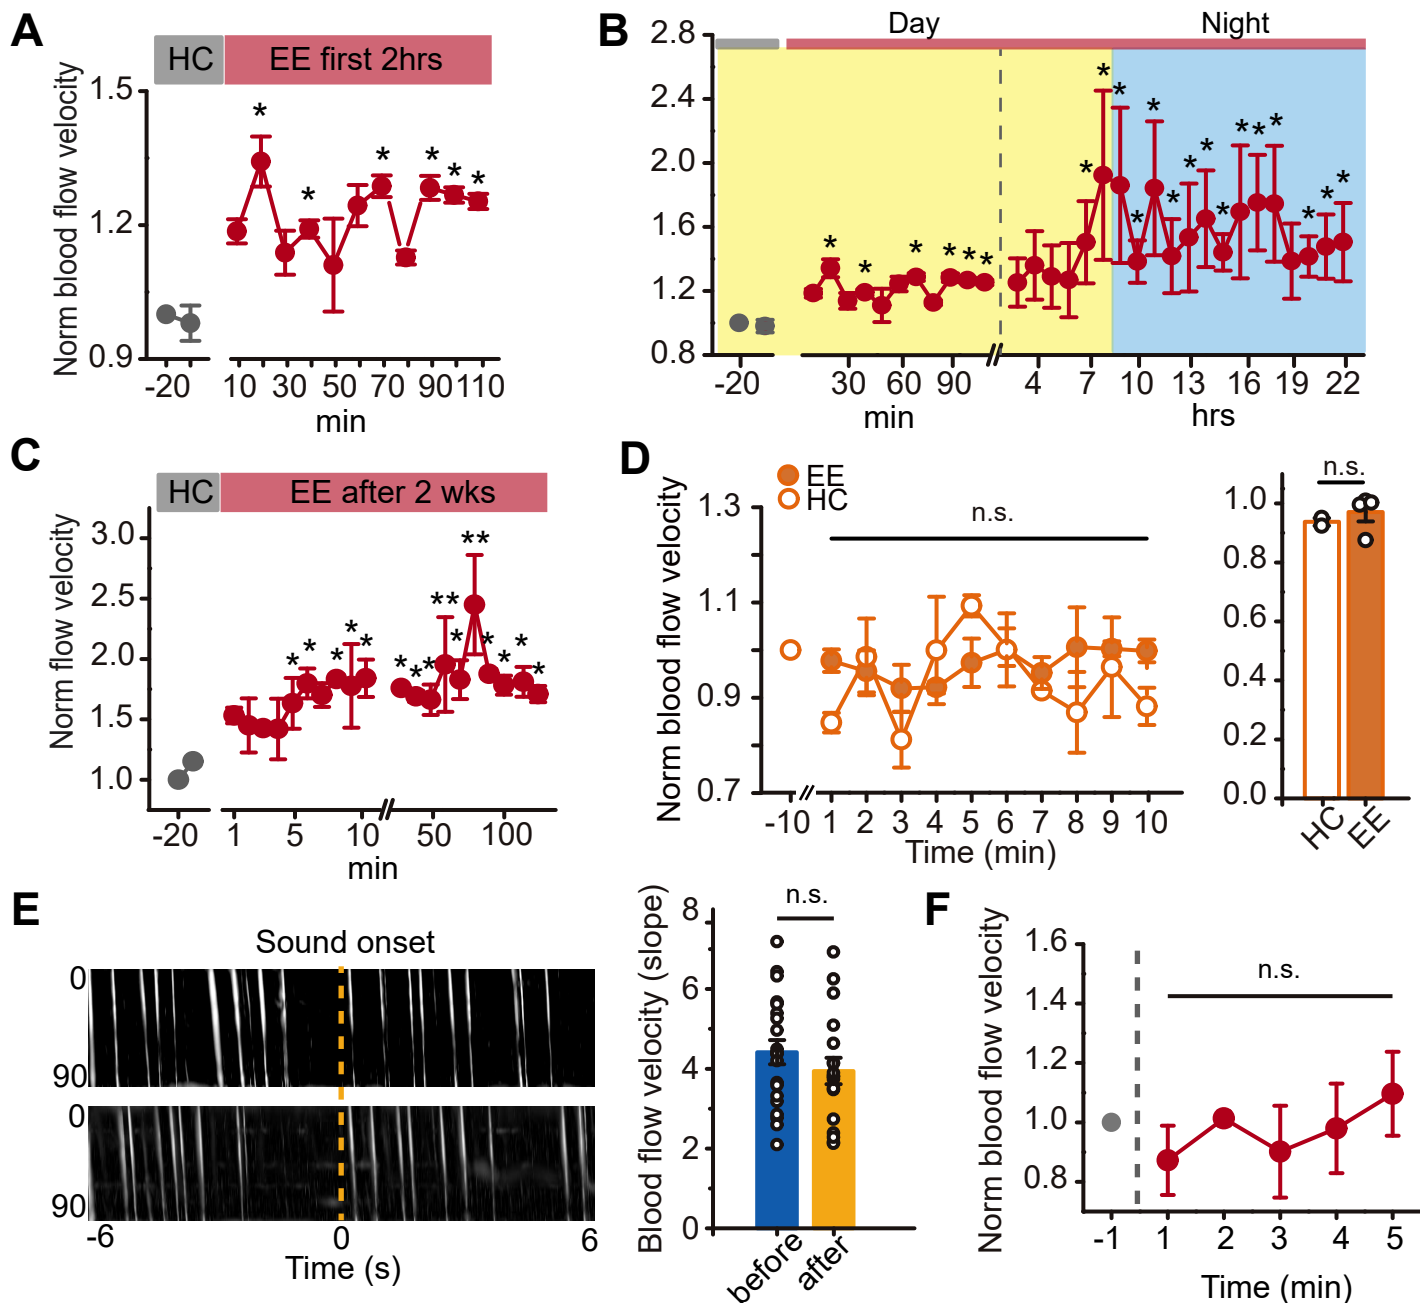

**Fig. S1 Hemodynamics in the dentate gyrus during long-term EE exploration and non hippocampus-dependent behavior (related to Fig. 1E & F)**

**A.** Normalized blood flow velocity of the first 2 h of EE exploration ( $n = 3$ , Kruskal-Wallis test was used to estimate the differences between later time points and time at -10,  $* P < 0.05$ ).

**B.** Blood flow velocity in EE for 24 h. Dashed line separates the first 2 h of recording, with 1 min per 10 min and the rest of the recording with 1 min per hour. Shading divides the day and night period. Statistical analysis was the same as that in A.

**C.** Blood flow velocity in the dentate gyrus on day 14 of EE exposure (1.5 h per day, the combination/location of the object in the EE was changed daily) ( $n = 2$ , Linear mixed model for longitudinal data was used to estimate the differences between later time points and time at -10.  $* P < 0.05$ ,  $** P < 0.05/20 = 0.0025$  after Bonferroni adjustment).

**D.** Blood flow velocity recorded in the auditory cortex during the mice were in HC or EE for 10 min ( $n = 4$  mice for EE and  $n = 2$  for HC, same analysis as in C,  $n.s. P > 0.05$ ; the average blood flow velocity in each animal is shown for the bar plot, Wilcoxon signed-rank test was performed using data from all time points,  $n.s. P > 0.05$ ).

**E-F.** Blood flow velocity recorded in the dentate gyrus during an auditory stimulation. **E.** Sample DMap of blood flow velocity aligned to sound onset (right) and velocity 1 second before or after sound onset ( $n = 2$ , each dot represents a velocity value detected, Mann-Whitney test,  $n.s. P > 0.05$ ). **F.** normalized blood flow velocity 1 min before auditory session started (in the same environment) and 5 min of stimulus session ( $n = 2$ , similar analysis as in C,  $n.s. P > 0.05$ ).

Fig. S2

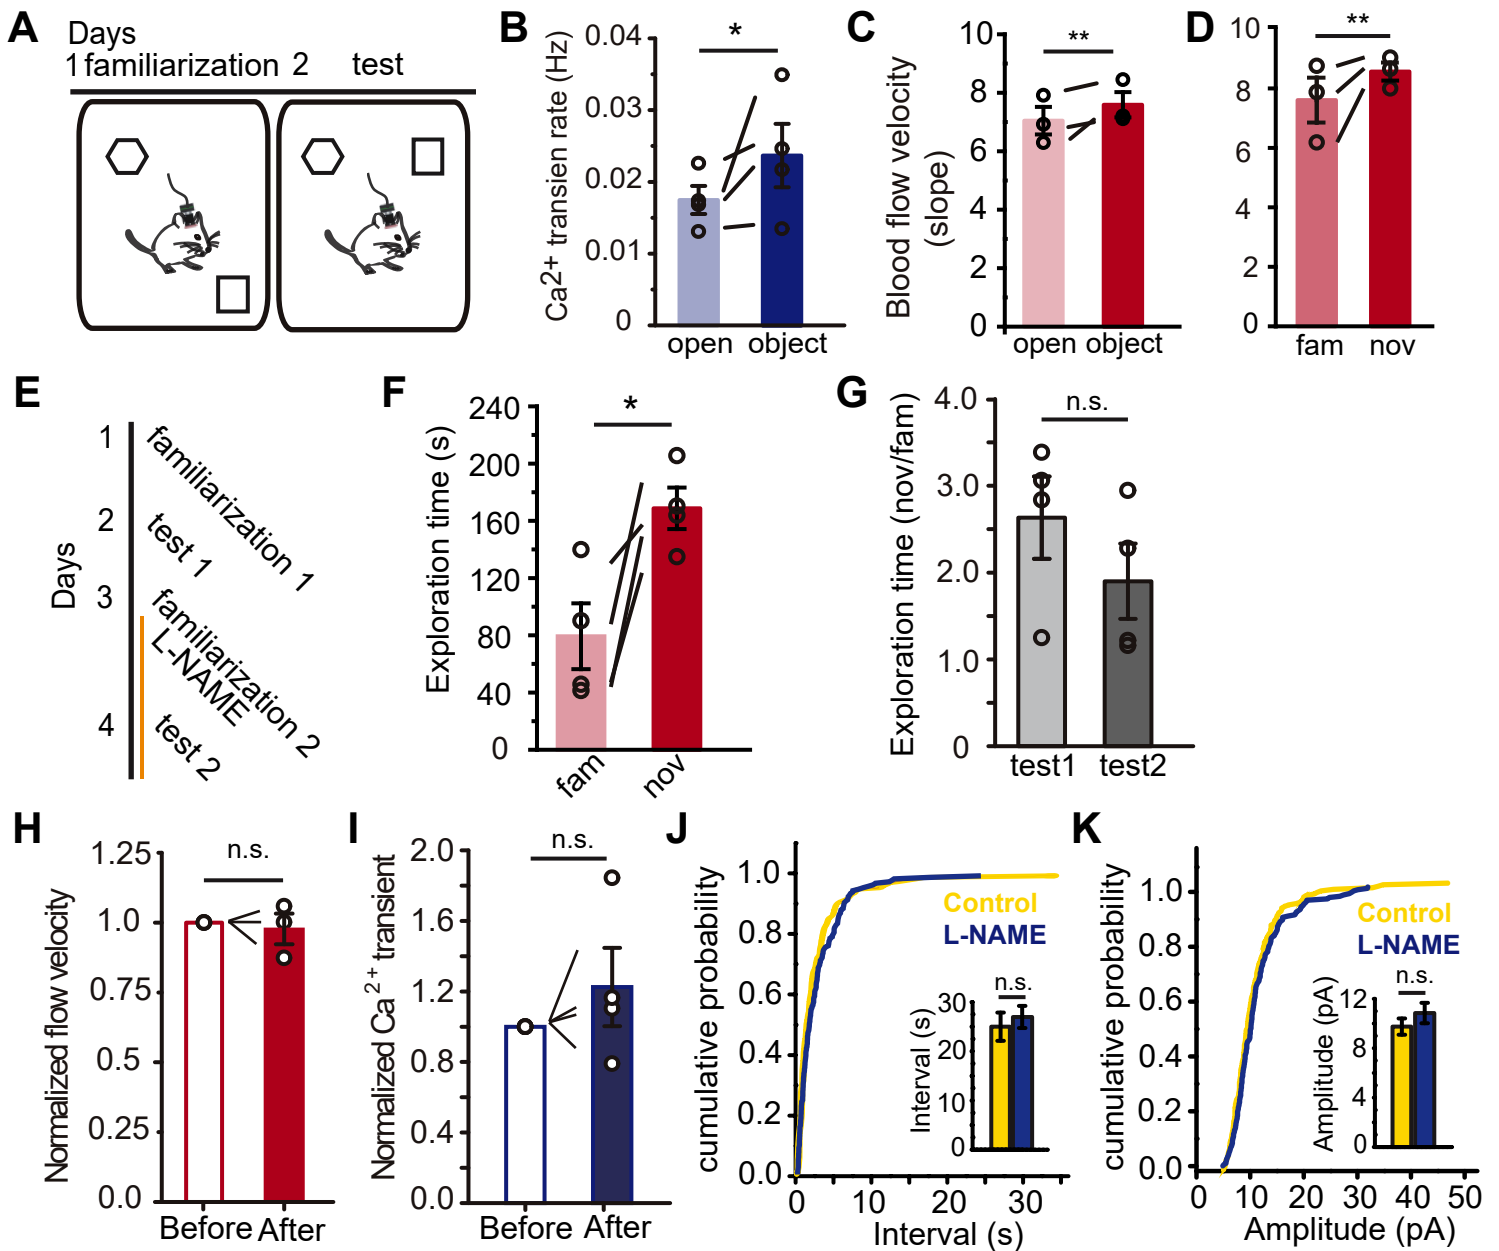

**Fig. S2 L-NAME administration exhibited minimal effects on behavior and DGC activity (related to Fig. 2C & D).**

**A.** Schematic of novel location recognition task procedure

**B.**  $\text{Ca}^{2+}$  transient rate in the open zone and object zones ( $n = 4$  tests,  $\text{Ca}^{2+}$  transient rate in all cells was used for statistical analysis but only mean values from each test were shown on the plot, paired Student's t-test, \*  $P < 0.05$ ).

**C.** Blood flow velocity in open and object zones ( $n = 3$ , each circle represents the averaged blood flow velocity in each mouse, all velocity values were used for statistical analysis, paired Student's t-test, \*\*  $P < 0.01$ ).

**D.** Blood flow velocity in the familiar and novel location zones on test day ( $n = 3$ , same analysis as **C**, \*\*  $P < 0.01$ ).

**E.** Experimental timeline for evaluating the effect of L-NAME on novel location recognition.

**F.** Exploration time in familiar and novel location zones on test 2 ( $n = 4$ , Kruskal-Wallis test, \*  $P < 0.05$ ).

**G.** Fold change in exploration time in the novel location zone over the familiar object zone on test 1 (before L-NAME) and test 2 (after L-NAME) day ( $n = 4$ , Kruskal-Wallis test, n.s.  $P > 0.05$ ).

**H.** Blood flow velocity 1 d before and after L-NAME administration in HC ( $n = 3$ , raw blood flow velocity was used for statistical analysis, Kruskal-Wallis test, n.s.  $P > 0.05$ ).

**I.**  $\text{Ca}^{2+}$  transient rate 1 d before and after L-NAME administration in HC ( $n = 3$ , same analysis as **H**, n.s.  $P > 0.05$ ).

**J.** The cumulative probability of the inter-event interval of miniature excitatory postsynaptic currents (mEPSCs) in DGCs; insert: Quantification of the mEPSC inter-event interval in the control and L-NAME conditions (Control:  $n = 8$  cells; L-NAME:  $n = 10$  cells, Kolmogorov-Smirnov test, n.s.,  $P > 0.05$ ).

**K.** The cumulative probability of the mEPSC amplitude in DGCs (Control:  $n = 8$  cells; L-NAME:  $n = 10$  cells, Kolmogorov-Smirnov test, n.s.,  $P > 0.05$ ).

Fig. S3

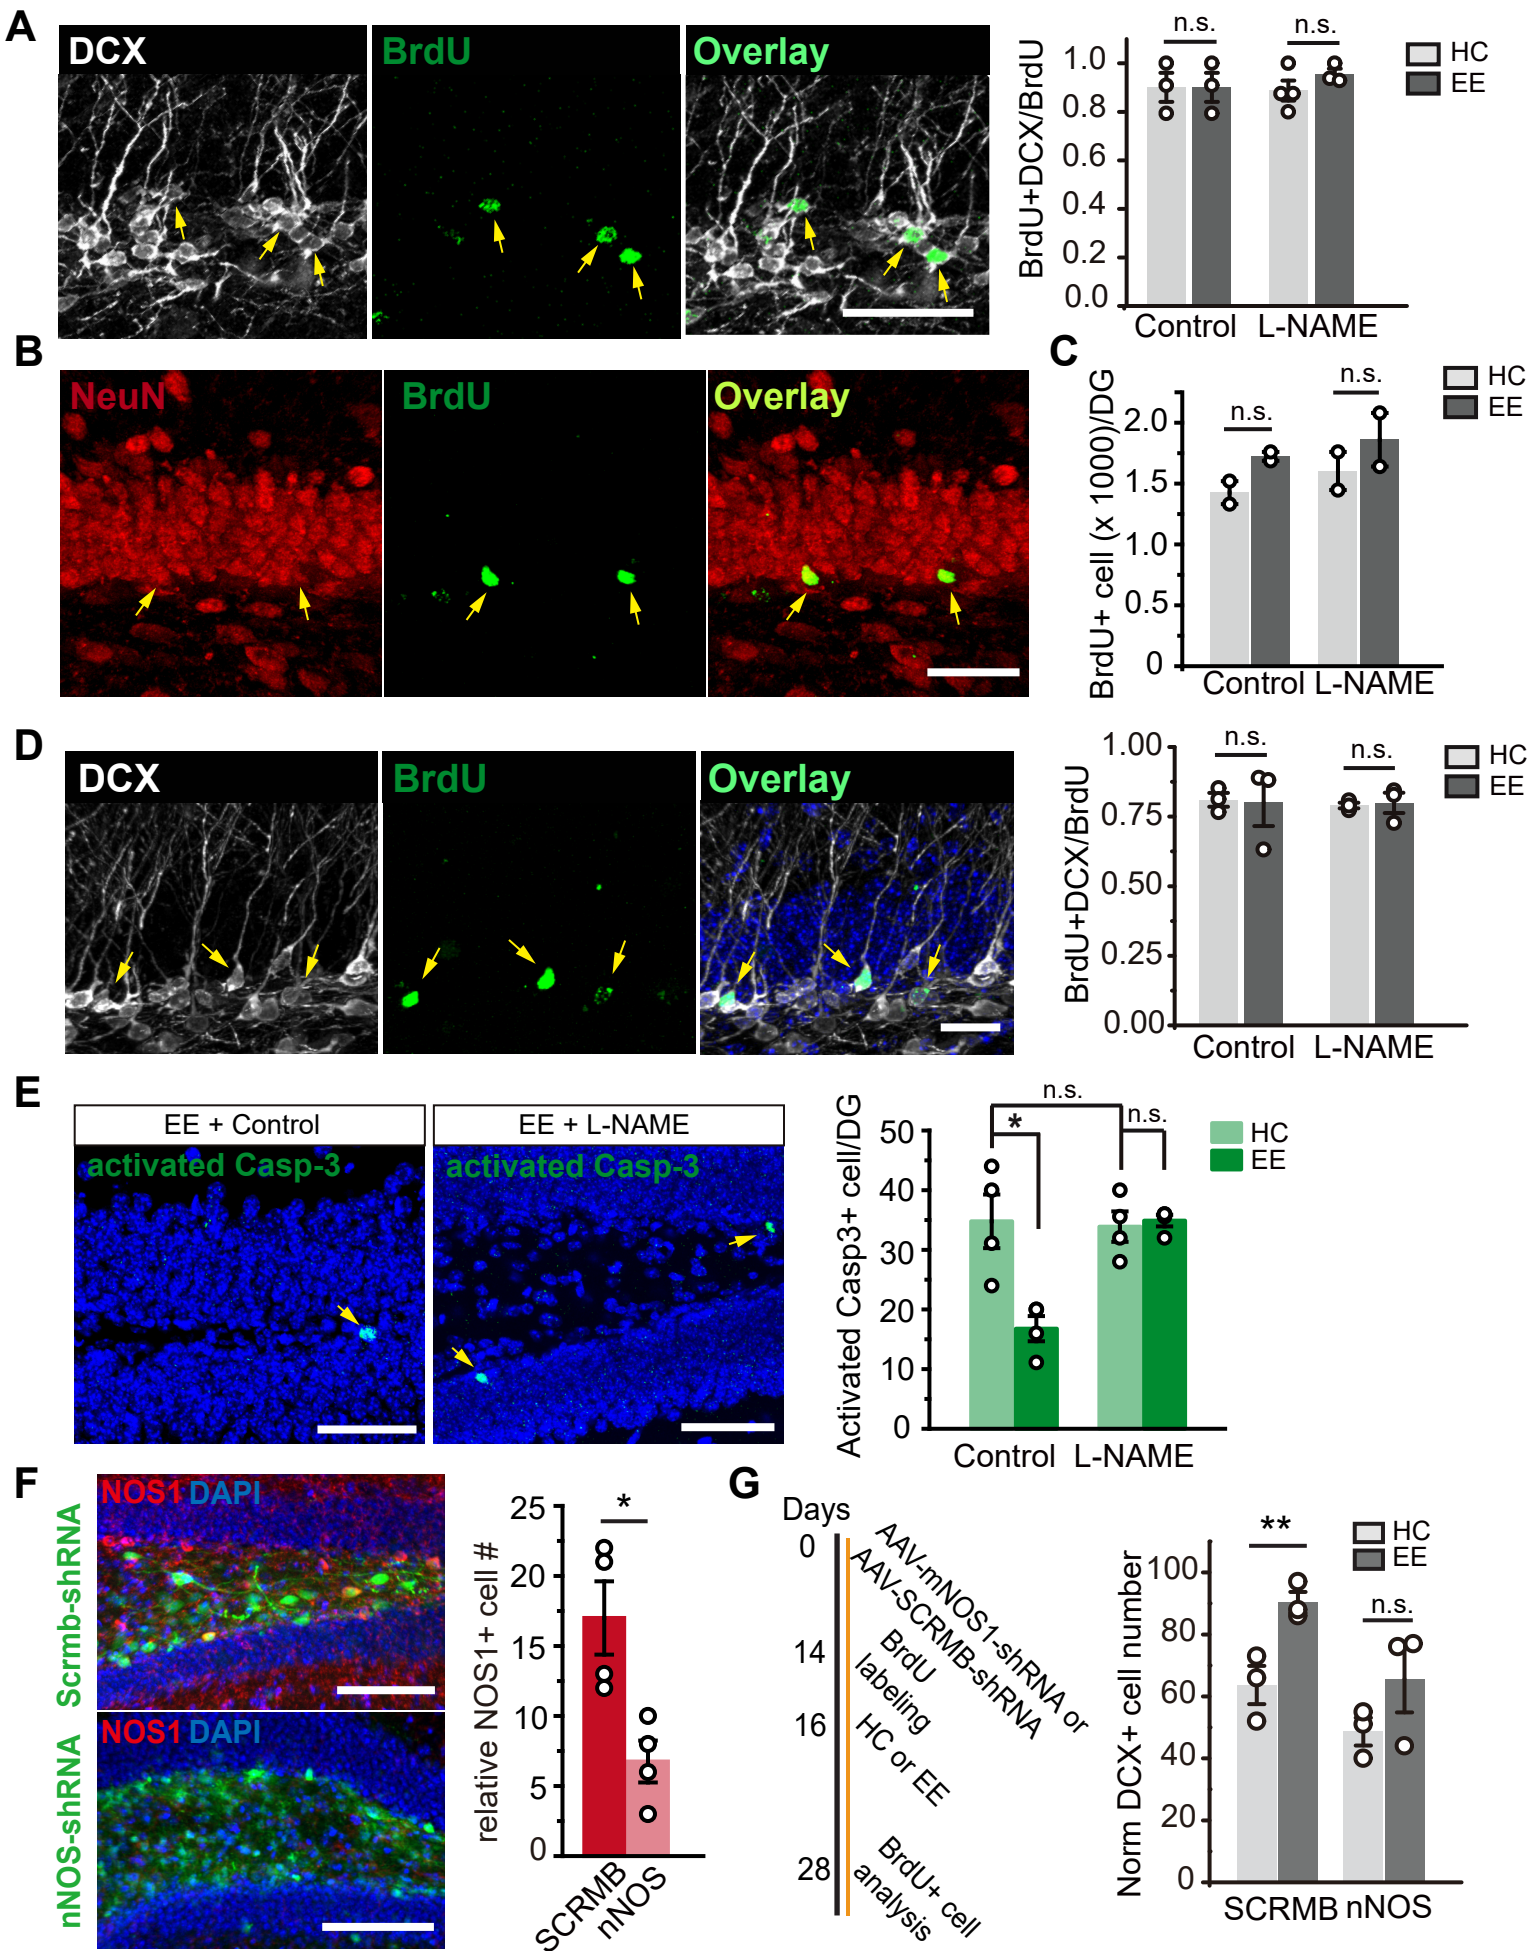

### **Fig. 3S NO signaling in adult hippocampal neurogenesis (related to Fig. 2E & F)**

- A.** Left, representative confocal images of BrdU and DCX colocalization in the dentate gyrus 14 d after BrdU delivery (silver: DCX, green: BrdU, scale bar: 100  $\mu$ m). Right, the ratio of BrdU and DCX colocalization did not differ across the four conditions. HC with water (n = 3) or L-NAME-containing water (n = 4) and EE with water (n = 3) or L-NAME-containing water (n = 3) (two-way ANOVA followed by Bonferroni post hoc test, n.s.  $P > 0.05$ ).
- B.** Representative confocal images of BrdU and NeuN colocalization in the dentate gyrus 14 d after BrdU delivery (red: NeuN, green: BrdU, scale bar: 40  $\mu$ m).
- C.** Quantification of the average number of BrdU+ cells in the dentate gyrus at 4 days post BrdU administration for every condition (n = 4, n.s., Two-Way ANOVA followed by Bonferroni post hoc test, n.s.,  $P > 0.05$ ).
- D.** Left, representative confocal images of BrdU and DCX colocalization in the dentate gyrus 4 d after BrdU delivery (silver: DCX, green: BrdU, scale bar: 20  $\mu$ m). Right, the ratio of BrdU and DCX colocalization did not differ across the four conditions. HC with water (n = 3) or L-NAME-containing water (n = 4) and EE with water (n = 3) or L-NAME-containing water (n = 3), two-way ANOVA with Bonferroni post hoc test, n.s.  $P > 0.05$ ).
- E.** Left, representative confocal images of activated caspase-3+ cells in the dentate gyrus from EE and EE with L-NAME (green: activated caspase-3, blue: DAPI, brain sections from Fig. 2E). Right, quantification of activated caspase-3+ cells in the dentate gyrus under the four conditions from Fig. 2E. (n = 4 for each condition, Two-Way ANOVA followed by Bonferroni post hoc test, \*  $P < 0.05$ , n.s.,  $P > 0.05$ ).
- F.** NOS1 knockdown efficiency, confocal images of nNOS immunofluorescent labeling in nNOS-shRNA- or scramble-shRNA-injected mice (red: NOS1, green: GFP-shRNA, blue: DAPI, scale bar: 100  $\mu$ m). Right, quantification of NOS1 fluorescence intensity in each condition (n = 4, Kruskal-Wallis test, \*  $P < 0.05$ ).
- G.** Experimental design timeline evaluating the effect of NOS1-shRNA knockdown on newborn neuron survival. Right, quantification of DCX+ cells in each condition (n = 3, two-way ANOVA with Bonferroni post hoc test, \*\*  $P < 0.01$  n.s.  $P > 0.05$ ).

Fig. S4

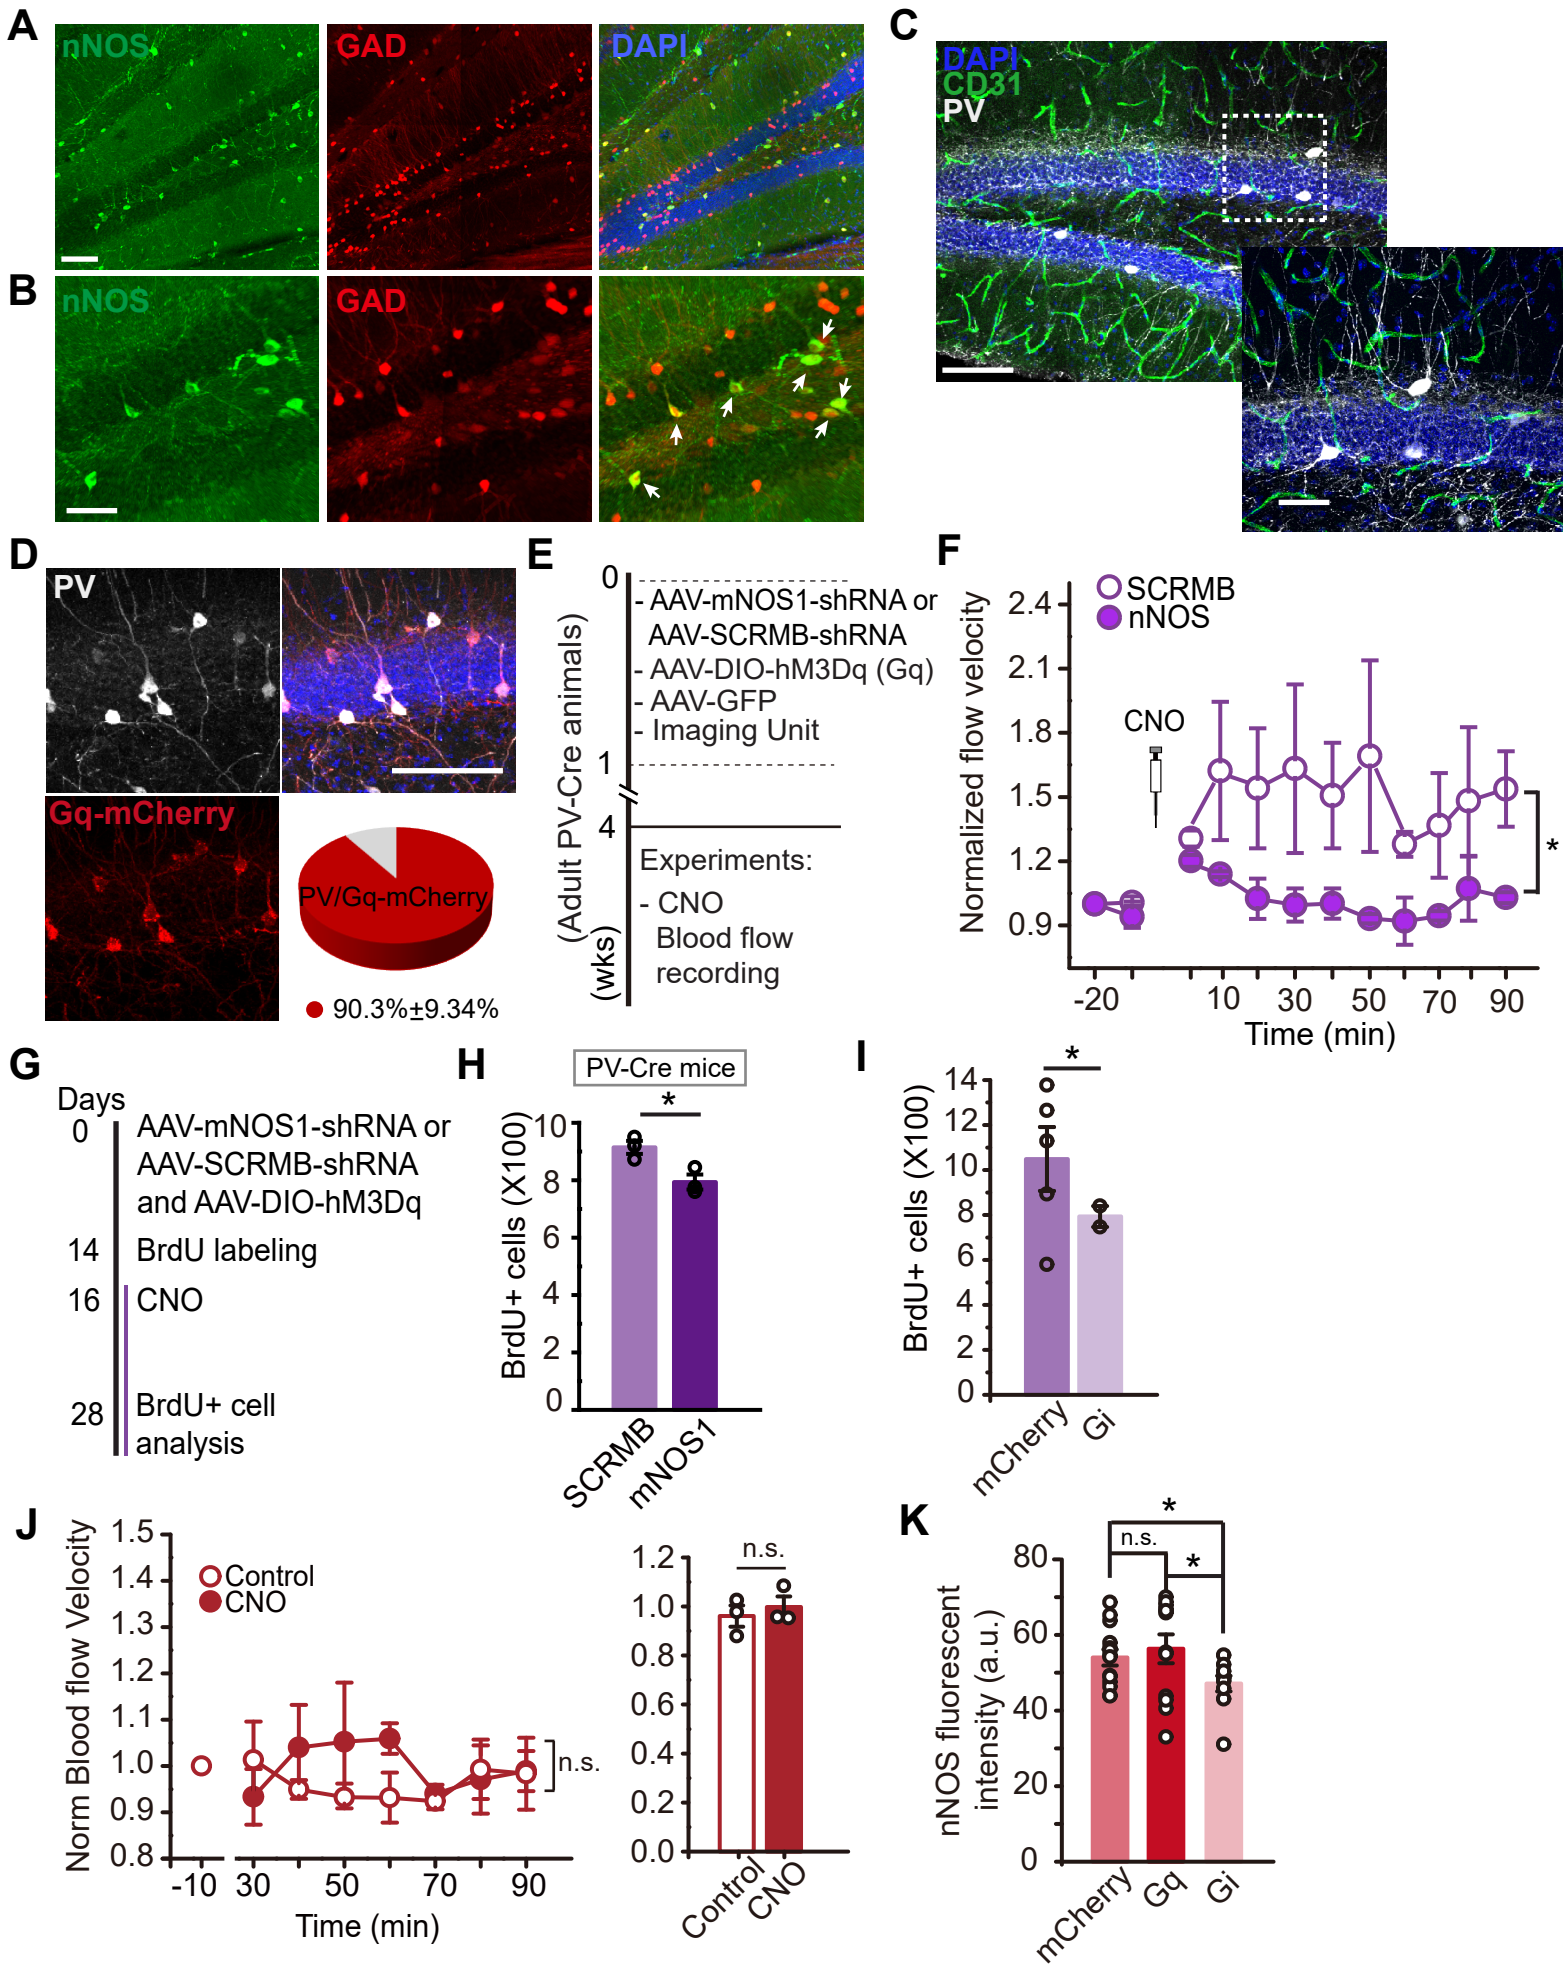

**Fig. S4 The role of NO signaling in PV+ neuron mediated hyperemia and neurogenesis (related to Fig. 3)**

- A.** Confocal images of NOS1 (green) expression in the dentate gyrus in a GAD-Cre::tdTomato (red) animal (scale bar: 100  $\mu$ m).
- B.** Enlarged confocal images of NOS1 and GAD2 colocalization in the sub-granular zone (scale bar: 50  $\mu$ m).
- C.** Confocal images of PV+ neurons and vasculature in the dentate gyrus (blue: DAPI; green: CD31; silver: PV, scale bar: 100  $\mu$ m). The image on the right is an enlarged area from the dashed box (scale bar: 50  $\mu$ m).
- D.** Confocal images of the colocalization of PV+ neurons with AAV-DIO-Gq-mCherry in the dentate granule cell layer from PV-Cre animals (n = 6, silver: PV, red: mCherry, blue: DAPI, 90.3%  $\pm$  9.34% of PV+ neurons were labeled by AAV, scale bar: 100  $\mu$ m. Enlarged image scale bar: 50  $\mu$ m)
- E.** Experimental timeline of blood flow imaging following nNOS knockdown in PV-Cre mice.
- F.** Normalized blood flow velocity in PV-Cre mice with scramble-shRNA (control) and NOS1-shRNA knockdown (n = 2, the value from all time point in each animal was used for statistical analysis, Kruskal-Wallis test, \* P < 0.05).
- G.** Experimental design of newborn neuron survival in nNOS knockdown the PV-Cre mice.
- H.** Quantification of BrdU+ cells in PV-Cre mice with scramble or NOS1-shRNA in the dentate gyrus (n = 3, Kruskal-Wallis test, \*\* P < 0.01).
- I.** Quantification of BrdU+ cells in PV-Cre mice injected with AAV-DIO-mCherry (n = 4) or -hM4Di (n = 2) in the dentate gyrus (Kruskal-Wallis test, \* P < 0.05).
- J.** Left: Normalized blood flow velocity in mice injected with GFP only (no DREADDs) in the dentate gyrus pre- and post-saline or CNO administration (n = 3, Linear mixed model for longitudinal data was used to estimate the differences between saline and CNO at each time point. n.s. P > 0.05). Right: Quantification of the average blood flow velocity in each condition (n = 3, Wilcoxon signed-rank test was performed using data from all time points, n.s. P > 0.05).
- K.** Quantification of NOS1 fluorescence intensity in PV-Cre mice injected with AAV-DIO-mCherry, -hM3Dq, or

Fig. S5

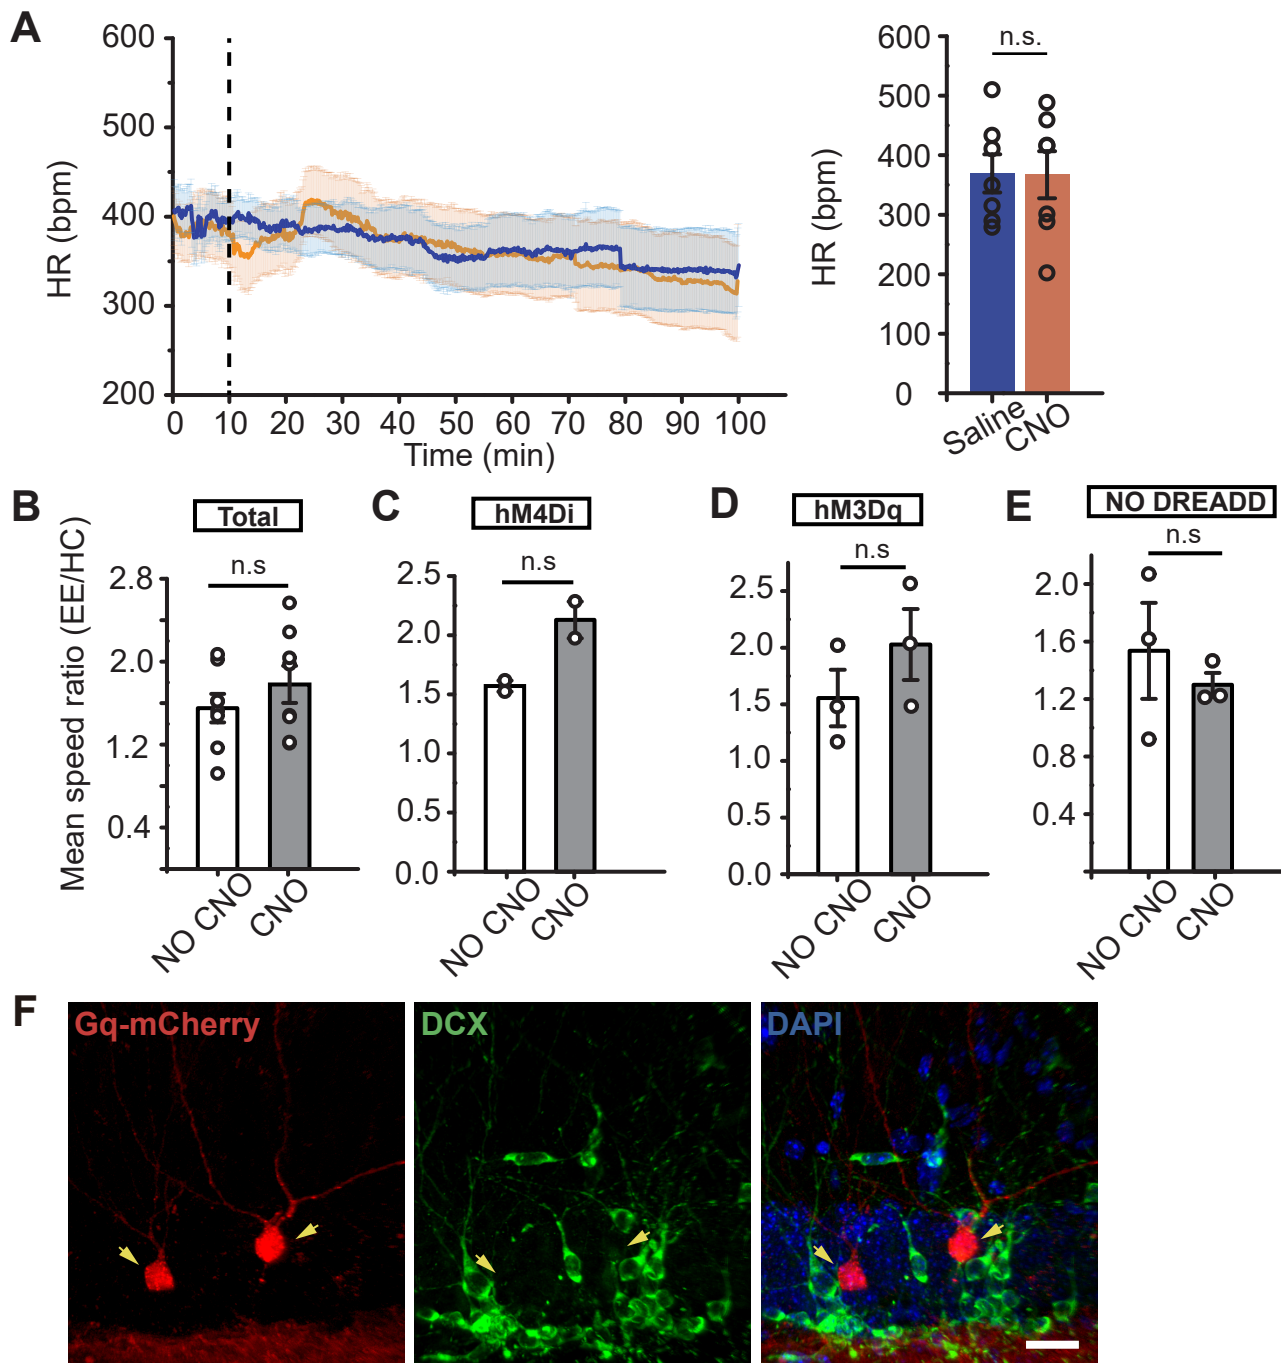

**Fig. S5 The manipulation of DGCs with DREADD exhibited minimal effects on physiological conditions (related to Fig. 4 & 5)**

**A.** Mice heart rates were recorded for the bidirectional manipulation (Fig. 4). Left: Heart rate throughout the recording sessions. The dashed line indicates the saline or CNO intraperitoneal injections. Right: Quantification of the average heart rate in each recording condition ( $n = 7$ , paired Student's t-test, n.s.,  $P > 0.05$ ).

**B-E.** CNO did not affect locomotion in the EE. **B.** The EE/HC ratio of total distance in all animals with or without CNO ( $n = 8$ , paired Student's t-test, n.s.,  $P > 0.05$ ). **C.** The EE/HC ratio of total distance in animals injected with Gi with or without CNO ( $n = 2$ , paired Student's t-test, n.s.,  $P > 0.05$ ). **D.** The EE/HC ratio of total distance in animals injected with Gq with or without CNO ( $n = 3$ , paired Student's t-test, n.s.,  $P > 0.05$ ). **E.** The EE/HC ratio of total distance in animals lacking DREADDs with or without CNO ( $n = 3$ , paired Student's t-test, n.s.,  $P > 0.05$ ).

**F.** Confocal images of DCX+ cells and AAV-CaMKII-Gq-mCherry (red: Gq-mcherry, green: DCX, blue: DAPI, scale bar: 20  $\mu\text{m}$ ).

Fig. S6

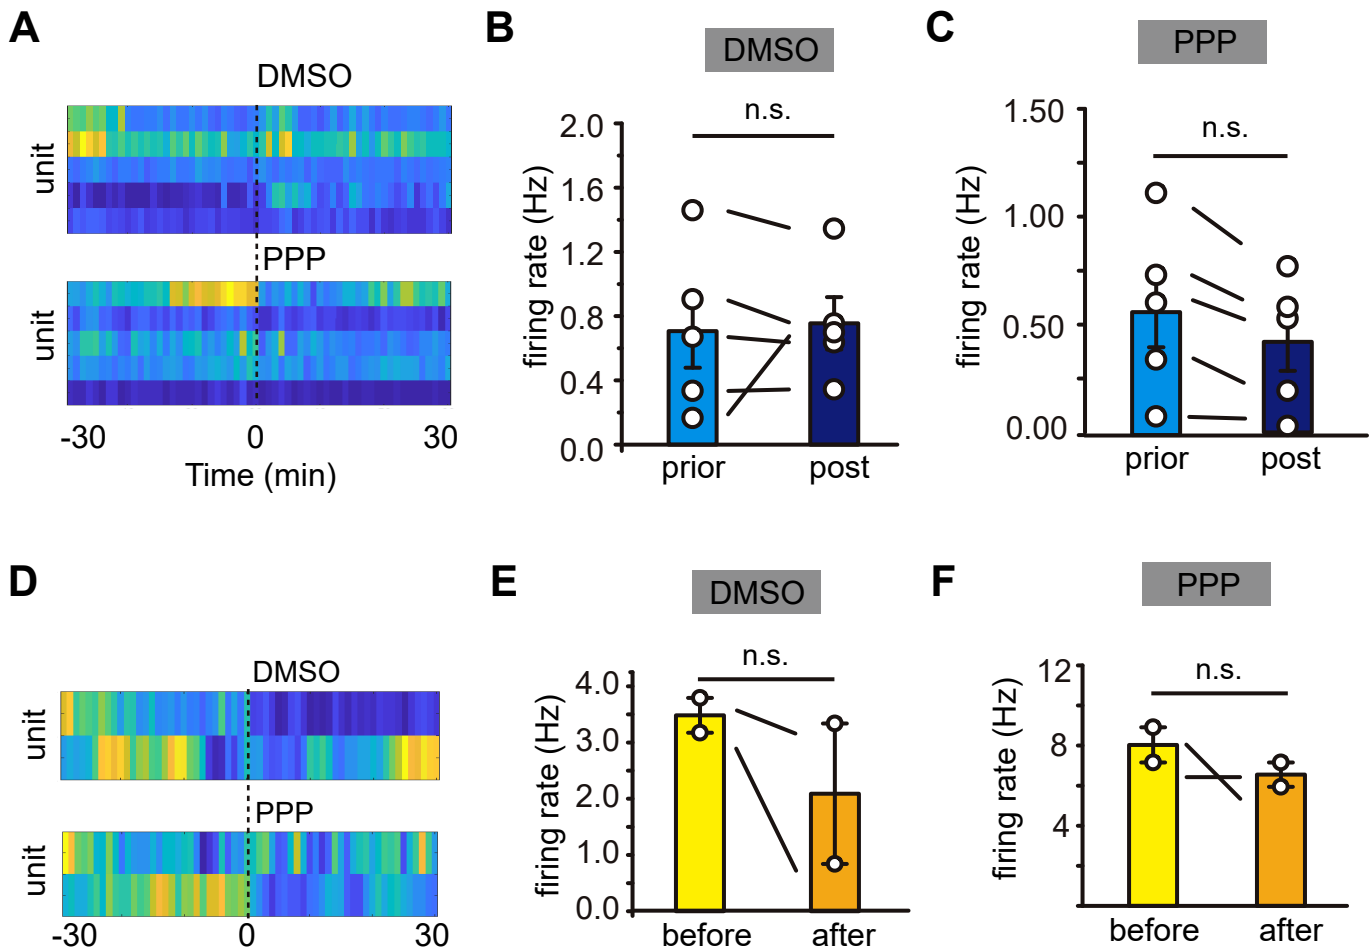

**Figure S6 PPP local infusion did not alter the neuronal activity in the dentate gyrus (related to Fig. 6)**  
**A.** Color map of in vivo electrophysiology recordings of DGCs pre- and post-DMSO/PPP administration.  
**B.** Quantification of DGC firing rate pre- and post-DMSO infusion (n = 5, Wilcoxon signed-rank test, n.s., P > 0.05).  
**C.** Quantification of DGC firing rate pre- and post-PPP infusion (n = 5, Wilcoxon signed-rank test, n.s., P > 0.05).  
**D.** Color map of in vivo electrophysiology interneuron recordings pre- and post-DMSO/PPP administration.  
**E.** Quantification of DGC firing rate pre- and post-DMSO infusion (n = 2 cells, Wilcoxon signed-rank test, n.s., P > 0.05).  
**F.** Quantification of DGC firing rate pre- and post-PPP infusion (n = 2 cells, Wilcoxon signed-rank test, n.s., P > 0.05).
